# Supplementary material
Source: PubMed Central journal article supplement (PMC6426902)
Supplement: 12264_2018_293_MOESM1_ESM.pdf [file 12264_2018_293_MOESM1_ESM.pdf]

## Supplementary Material

### Folate/Vitamin B Alleviates Hyperhomocysteinemia-Induced Alzheimer-Like Pathologies in Rat Retina

Jing Guo<sup>1</sup>, Shaozhou Ni<sup>3</sup>, Qihang Li<sup>4</sup>, Jian-Zhi Wang<sup>1,2,\*</sup>, Ying Yang<sup>1,\*</sup>

<sup>1</sup>Department of Pathophysiology, School of Basic Medicine and Collaborative Innovation Center for Brain Science, Key Laboratory for Neurological Disorders of the Ministry of Education of China, Tongji Medical College, Huazhong University of Science and Technology, Wuhan 430030, China

<sup>2</sup>Co-innovation Center of Neuroregeneration, Nantong University, Nantong 226000, China

<sup>3</sup>Emergency Department, Zhongnan Hospital of Wuhan University, Wuhan 430071, China

<sup>4</sup>School of Optometry and Ophthalmology and Eye Hospital, Wenzhou Medical College, Wenzhou 325000, China

**Table S1. Antibodies used in this study**

| Antibody | Epitopes                                  | mAb/pAb | Dilution                       | Source                      |
|----------|-------------------------------------------|---------|--------------------------------|-----------------------------|
| DM1A     | $\alpha$ -Tubulin                         | mAb     | 1:2000 for WB                  | Sigma (St. Louis, MO)       |
| APP      | Anti-APP antibody                         | pAb     | 1:1000 for WB                  | Millipore (Billerica, MA)   |
| PS1      | Anti-presenilin-1 antibody                | pAb     | 1:500 for WB                   | Millipore                   |
| BACE1    | BACE C-15                                 | pAb     | 1:500 for WB                   | Santa Cruz (Santa Cruz, CA) |
| Tau1     | Non-phosphorylated tau at Ser-198/199/202 | mAb     | 1:1000 for WB<br>1:200 for IHC | Chemicon (Temecula, CA)     |
| pS262    | Phosphorylated tau at Ser262              | pAb     | 1:500 for WB<br>1:200 for IHC  | SAB (Zhejiang, China)       |
| pS356    | Phosphorylated tau                        | pAb     | 1:500 for WB                   | SAB                         |

---

|                    |                                                                    |     |                                |                              |
|--------------------|--------------------------------------------------------------------|-----|--------------------------------|------------------------------|
| 6E10               | at Ser356<br>A $\beta$ 1-16                                        | mAb | 1:200 for IHC                  | Covance (Princeton, NJ)      |
| PP2Ac              | PP-2A catalytic<br>subunit (both $\alpha$ and<br>$\beta$ isoforms) | pAb | 1:1000 for WB                  | Biosource (Camarillo, CA)    |
| p-PP2Ac            | Phosphorylated<br>PP2A at Tyr307                                   | pAb | 1:1000 for WB                  | Santa Cruz                   |
| M-PP2Ac            | Methylated PP2Ac                                                   | pAb | 1:1000 for WB                  | Abcam (Cambridge, UK)        |
| DM-PP2Ac           | Demethylated                                                       | pAb | 1:1000 for WB<br>1:200 for IHC | Abcam                        |
| S9-GSK-3 $\beta$   | Phosphorylated<br>GSK-3 $\beta$ at Ser9                            | pAb | 1:1000 for WB                  | Cell Signaling (Danvers, MA) |
| Y216-GSK-3 $\beta$ | Phosphorylated<br>GSK-3 $\beta$ at Tyr216                          | mAb | 1:1000 for WB                  | Millipore                    |
| T-GSK-3 $\beta$    | Total GSK-3 $\beta$                                                | pAb | 1:1000 for WB                  | Cell Signaling               |

---
